# Supplementary material
Source: publisher site journal article supplement (https://www.dovepress.com/article/401123)
Supplement: Supplementary file 1 [file get_supplementary_file.php]

**Supplementary Table 1** Correlation profile of 24 types of immune cells with the expression of ICOS and ICOSLG.

| Immune cells | ICOS | | ICOSLG | |
| --- | --- | --- | --- | --- |
| Rho (Spearman) | P value | Rho (Spearman) | P value |
| aDC | 0.668 | **<0.001** | 0.095 | **0.016** |
| B cells | 0.539 | **<0.001** | 0.027 | 0.490 |
| CD8 T cells | 0.390 | **<0.001** | 0.155 | **<0.001** |
| Cytotoxic cells | 0.638 | **<0.001** | 0.094 | **0.016** |
| DC | 0.599 | **<0.001** | 0.054 | 0.170 |
| Eosinophils | 0.350 | **<0.001** | 0.041 | 0.298 |
| iDC | 0.471 | **<0.001** | 0.114 | **0.004** |
| Macrophages | 0.604 | **<0.001** | 0.134 | **<0.001** |
| Mast cells | 0.432 | **<0.001** | 0.067 | 0.089 |
| Neutrophils | 0.493 | **<0.001** | 0.010 | 0.793 |
| NK CD56bright cells | -0.089 | **0.023** | -0.008 | 0.847 |
| NK CD56dim cells | 0.344 | **<0.001** | 0.091 | **0.020** |
| NK cells | 0.139 | **<0.001** | 0.228 | **<0.001** |
| pDC | 0.203 | **<0.001** | 0.089 | **0.024** |
| T cells | 0.735 | **<0.001** | 0.091 | **0.020** |
| T helper cells | 0.595 | **<0.001** | 0.091 | **0.020** |
| Tcm | 0.188 | **<0.001** | 0.155 | **<0.001** |
| Tem | 0.370 | **<0.001** | 0.139 | **<0.001** |
| TFH | 0.482 | **<0.001** | 0.111 | **0.005** |
| Tgd | 0.392 | **<0.001** | 0.108 | **0.006** |
| Th1 cells | 0.705 | **<0.001** | 0.111 | **0.005** |
| Th17 cells | 0.027 | 0.499 | -0.020 | 0.610 |
| Th2 cells | 0.353 | **<0.001** | 0.049 | 0.211 |
| TReg | 0.580 | **<0.001** | 0.142 | **<0.001** |

**Note:** Bold values are statistically significant (P value < 0.05).

**Supplementary Table 2** Correlation profile of immunoinhibitors with ICOS and ICOSLG expression.

| Immunoinhibitors | ICOS | | ICOSLG | |
| --- | --- | --- | --- | --- |
| Rho (Spearman) | P value | Rho (Spearman) | P value |
| ADORA2A | 0.368 | **<0.001** | 0.149 | **<0.001** |
| BTLA | 0.712 | **<0.001** | 0.128 | **0.001** |
| CD160 | 0.401 | **<0.001** | 0.091 | **0.021** |
| CD244 | 0.659 | **<0.001** | -0.010 | 0.794 |
| CD274 | 0.771 | **<0.001** | 0.105 | **0.007** |
| CD96 | 0.824 | **<0.001** | 0.141 | **<0.001** |
| CSF1R | 0.597 | **<0.001** | 0.158 | **<0.001** |
| CTLA4 | 0.814 | **<0.001** | 0.136 | **<0.001** |
| HAVCR2 | 0.730 | **<0.001** | 0.148 | **<0.001** |
| IDO1 | 0.724 | **<0.001** | 0.100 | **0.011** |
| IL10 | 0.664 | **<0.001** | 0.045 | 0.252 |
| IL10RB | -0.007 | 0.860 | 0.072 | 0.067 |
| KDR | 0.418 | **<0.001** | 0.154 | **<0.001** |
| KIR2DL1 | 0.335 | **<0.001** | 0.088 | **0.026** |
| KIR2DL3 | 0.318 | **<0.001** | 0.087 | **0.027** |
| LAG3 | 0.626 | **<0.001** | 0.085 | **0.031** |
| LGALS9 | 0.057 | 0.144 | 0.155 | **<0.001** |
| PDCD1 | 0.617 | **<0.001** | 0.134 | **<0.001** |
| PDCD1LG2 | 0.794 | **<0.001** | 0.122 | **0.002** |
| TGFB1 | 0.406 | **<0.001** | 0.103 | **0.009** |
| TGFBR1 | 0.352 | **<0.001** | 0.109 | **0.005** |
| TIGIT | 0.828 | **<0.001** | 0.171 | **<0.001** |
| VTCN1 | 0.057 | 0.147 | -0.005 | 0.894 |

**Note:** Bold values are statistically significant (P value < 0.05).

**Supplementary Table 3** Clinicopathological characteristics according to ICOS and ICOSLG expression in studied lesions analyzed by IHC.

| Characteristic | | ICOShigh | ICOSlow | Total | P value | ICOSLGhigh | ICOSLGlow | Total | P value |
| --- | --- | --- | --- | --- | --- | --- | --- | --- | --- |
| CEA | <=5 | 32 (32.7%) | 66 (67.3%) | 98 | 0.372 | 24 (24.5%) | 74 (75.5%) | 98 | 0.696 |
| >5 | 9 (42.9%) | 12 (57.1%) | 21 |  | 6 (28.6%) | 15 (71.4%) | 21 |  |
| CA199 | <=37 | 40 (34.5%) | 76 (65.5%) | 116 | 0.727 | 29 (25.0%) | 87 (75.0%) | 116 | 0.585 |
| >37 | 1 (33.3%) | 2 (66.7%) | 3 |  | 1 (33.3%) | 2 (66.7%) | 3 |  |
| CA125 | <=35 | 40 (34.2%) | 77 (65.8%) | 117 | 0.572 | 29 (24.8%) | 88 (75.2%) | 117 | 0.442 |
| >35 | 1 (50.0%) | 1 (50.0%) | 2 |  | 1 (50.0%) | 1 (50.0%) | 2 |  |

**Note**: Bold values are statistically significant (P value < 0.05).


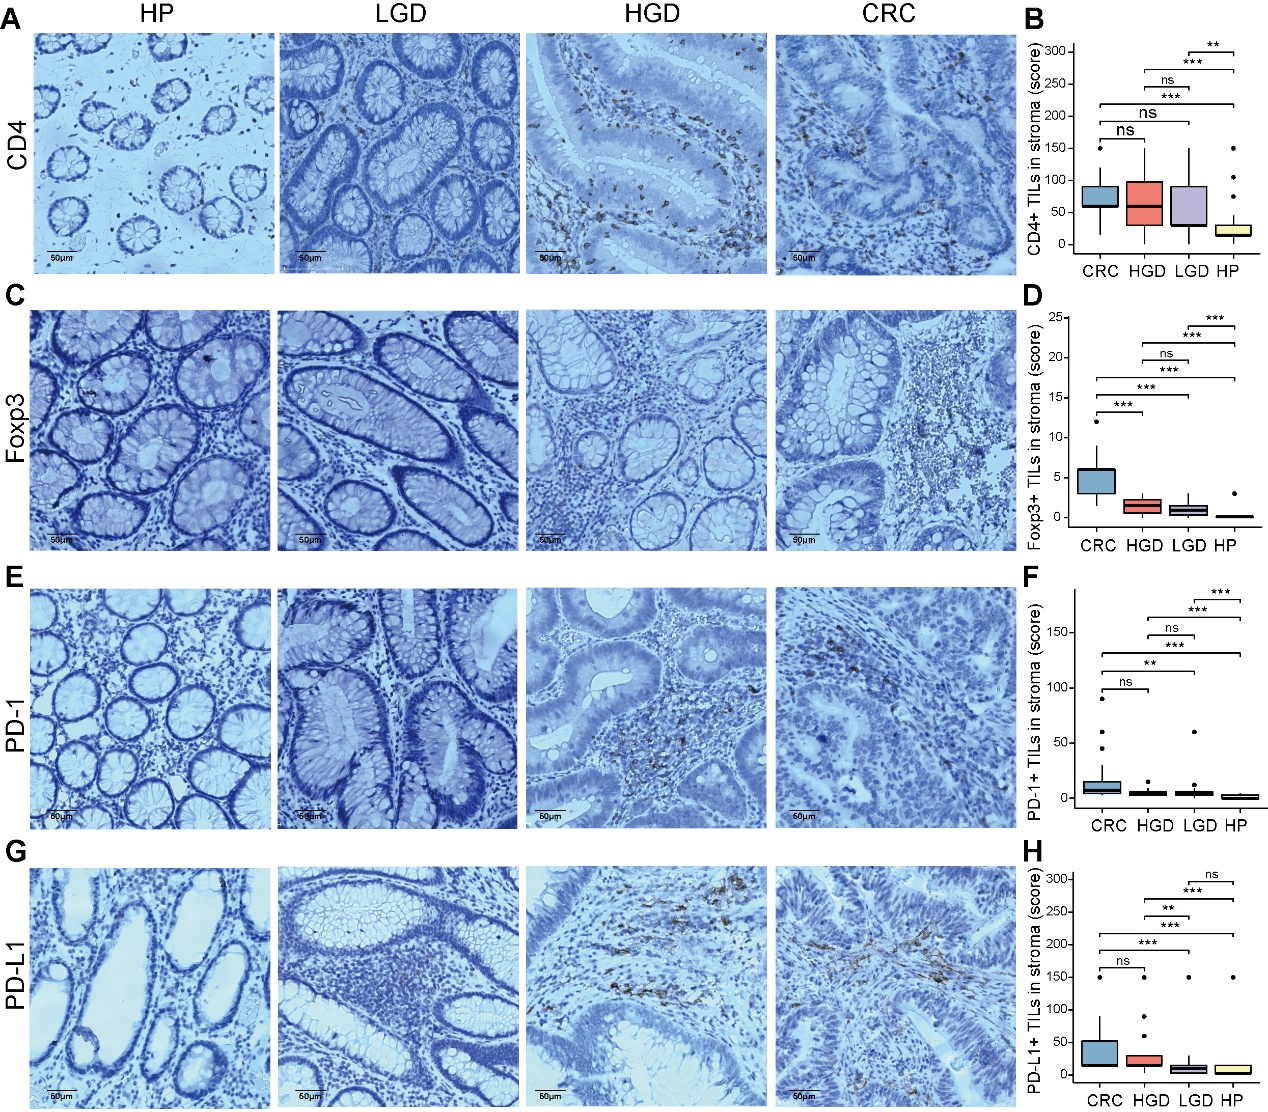


**Supplementary Figure 1.** The association of CD4+/Foxp3+ TILs and PD-1/PD-L1 with the progression of precancerous–carcinoma lesions. (A, B) CD4+ T cells in HP, LGD, HGD, or CRC tissues from the clinical cohort. (C, D) Foxp3+ T cells in HP, LGD, HGD, or CRC tissues from the clinical cohort. (E, F) Immunohistochemical staining of PD-1 in HP, LGD, HGD, and CRC samples. (G, H) Immunohistochemical staining of PD-L1 in HP, LGD, HGD, and CRC samples. Bar scale = 50 μm. *p < 0.05, **p < 0.01, ***p < 0.001, ns, no significant difference.
